# Supplementary material
Source: Springer Nature journal article supplement (https://www.springermedizin.de/resource/supplementary/12961_2012_264_MOESM3_ESM.pdf/9570920)

# TB Incidence and Est TB R&D Expenditure (2010)

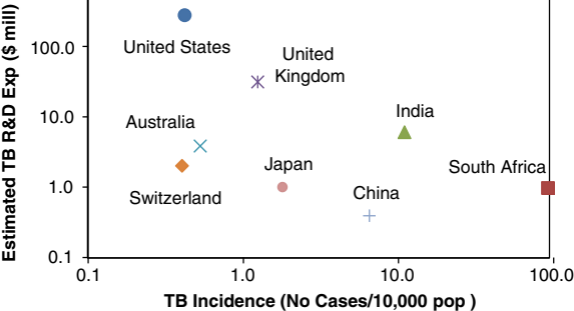

Supplement: MOESM3 [file 9570920]
